# Supplementary material for: Facile flame retardant finishing of cotton fabric with hydrated sodium metaborate
Source: Springer Nature journal article supplement (doi:10.1007/s10570-019-02371-7), 2019-03-18
Supplement: MOESM1 [file 16558288]

**Facile Flame Retardant Finishing of Cotton Fabric with Hydrated Sodium Metaborate**

Benjamin Tawiah 1a, Bin Yu 1a, Wei Yang 2, Richard K.K. Yuen 2, Bin Fei 1*,

1 Institute of Textiles and Clothing, Hong Kong Polytechnic University, Hong Kong, China

2 Department of Civil and Architectural Engineering, City University of Hong Kong, Hong Kong, China

*Corresponding Author: Fei Bin

Tel: +852 27664795, Email: [bin.fei@polyu.edu.hk](mailto:bin.fei@polyu.edu.hk)

a Contributed equally (co-first author)

**SUPPLEMENTARY MATERIAL**

Figure S1. DTG curve of SMB, untreated cotton fabric and SMB treated Cotton fabric.

Table S1 TGA data DTG data of sodium metaborate, SMB treated and untreated cotton fabric

| Sample | T-5%  (oC) | Tmax  (oC) | M.L.R.  Tmax (%) | C.R (wt %) @  Tmax 700 oC | |
| --- | --- | --- | --- | --- | --- |
| SMB | 244.3 | 157.8 | - 0.06 | 98.0 | 81.2 |
| U.COT | 310.1 | 361.5 | - 2.4 | 98.6 | 2.4 |
| SMB T.COT | 265.4 | 309.2 | - 0.4 | 84.7 | 41.5 |
| SMB T.C Wa. | 244.3 | 360.9 | -5.0 | 71.9 | 18.4 |

*M.L.R: Mass loss rate, C.R: Char residue*


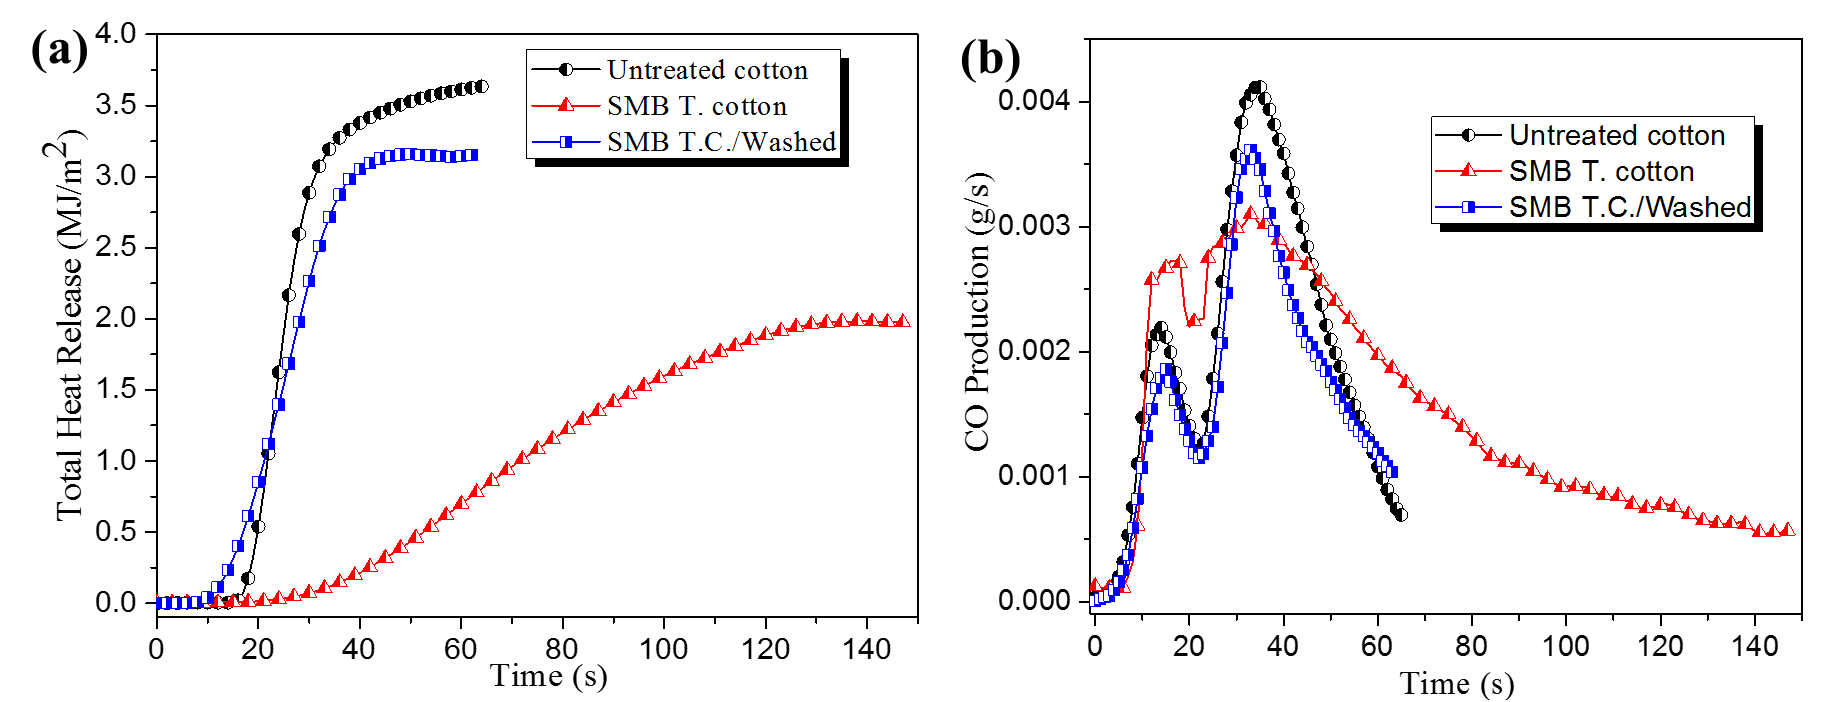


Figure S2. Cone calorimeter curves of (a) total heat release (b) CO production

Table S2. Cone calorimeter data at an external heat flux of 35 kW/m2.

| Sample | TTI (s) | PHRR  (kW/m2) | THR (MJ/m2) | TSR  (m2) | PCOP  (g/s) | PCO2P (g/s) | Residue  Wt% | LOI (%) |
| --- | --- | --- | --- | --- | --- | --- | --- | --- |
| Control | 16 ±  0.2 | 295.3 ±  7.2 | 3.6 ±  1.1 | 13.3 ±  0.2 | 0.0042 ±  0.001 | 0.42 ±  0.01 | 8.6 ± 0.02 | 17.2 |
| SMB T. | 19 ±  0.2 | 24.3 ±  2.2 | 1.9 ±  0.6 | 13.1 ±  0.01 | 0.0030 ±  0.001 | 0.061 ±  0.03 | 43.1 ±  0.01 | 28.5 |
| SMB T.C/W | 16 ±  3.2 | 181.2 ±  2.1 | 3.1 ±  0.2 | 8.6 ±  0.03 | 0.0036 ±  0.008 | 0.27 ±  0.03 | 20.2 ±  0.2 | 23.6 |


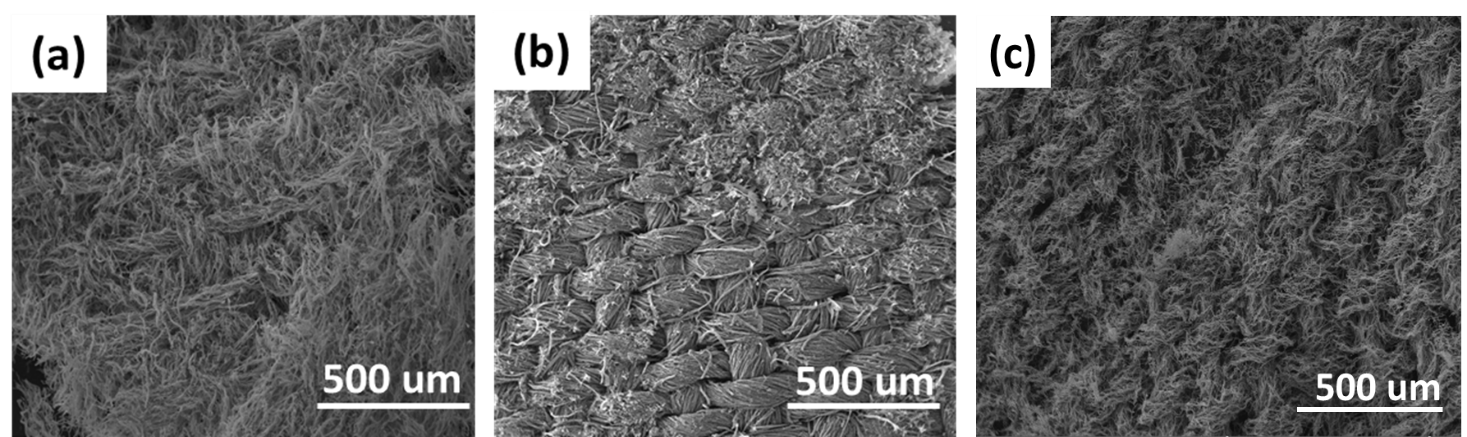


Fig. S3. SEM images of char after CCT: (a) Control fabric (b) SMB T, fabric (c) washed fabric
